# Supplementary material for: Profiles of microRNA networks in intestinal epithelial cells in a mouse model of colitis
Source: PubMed Central journal article supplement (PMC4673535; doi:10.1038/srep18174), 2015-12-09
Supplement: srep18174-s1.pdf [file srep18174-s1.pdf]

## Supplementary Information

### Profiles of microRNA networks in intestinal epithelial cells in a mouse model of colitis

Juneyoung Lee<sup>1,3,#</sup>, Eun Jeong Park<sup>1,7,#</sup>, Yoshikazu Yuki<sup>1</sup>, Shandar Ahmad<sup>4</sup>, Kenji Mizuguchi<sup>4</sup>, Ken J. Ishii<sup>5,6</sup>, Motomu Shimaoka<sup>7</sup>, and Hiroshi Kiyono<sup>1,2,3,8,\*</sup>

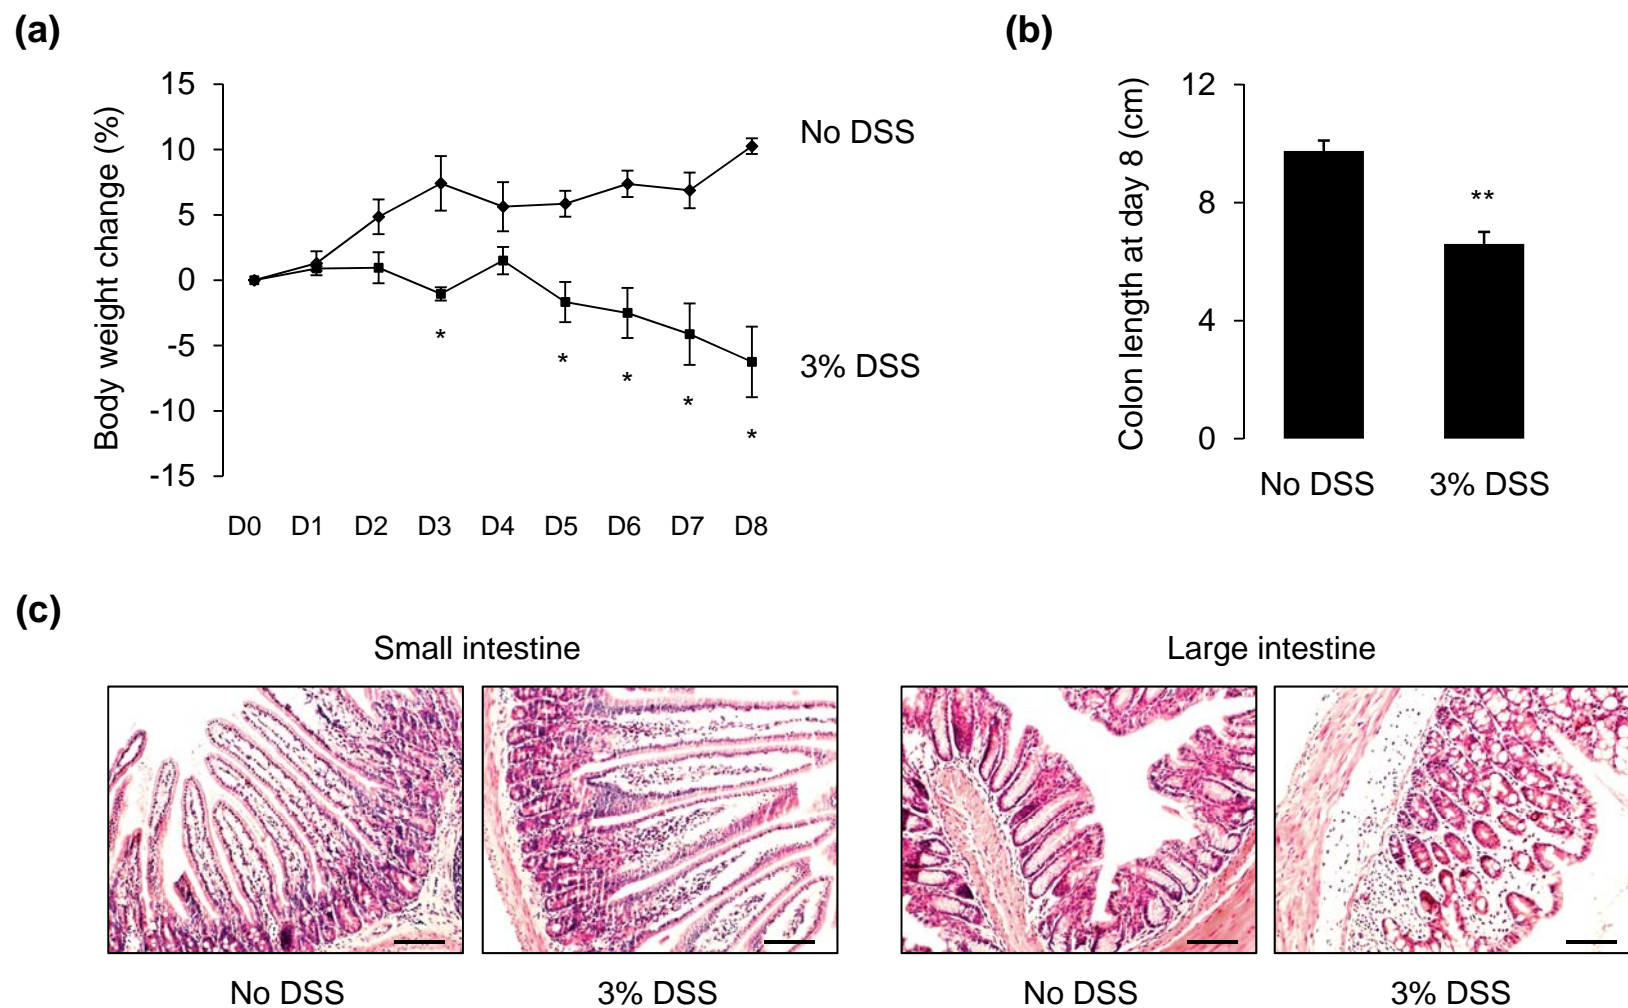

**Supplementary Figure 1.** Macroscopic and microscopic assessment of DSS-induced colitis. **(a)** The body weight of the mice treated with or without 3% DSS for 8 days was monitored once daily. Mice treated with 3% DSS showed a significant loss of body weight compared with the control (no DSS) group ( $n = 4$  mice/group). **(b)** Colon lengths were measured. The mice treated with DSS exhibited a significant reduction in colon length ( $n = 4$  mice/group). Data are presented as mean  $\pm$  1 standard deviations. \*,  $0.01 < p < 0.05$ ; \*\*,  $0.001 < p < 0.01$  vs. control (two-tailed Student's  $t$ -test). **(c)** The histology of intestinal tissues was examined in control and DSS-treated mice on day 8 by means of hematoxylin and eosin staining of paraffin-embedded sections. Scale bars, 100  $\mu$ m. Data are representative of at least three independent experiments.

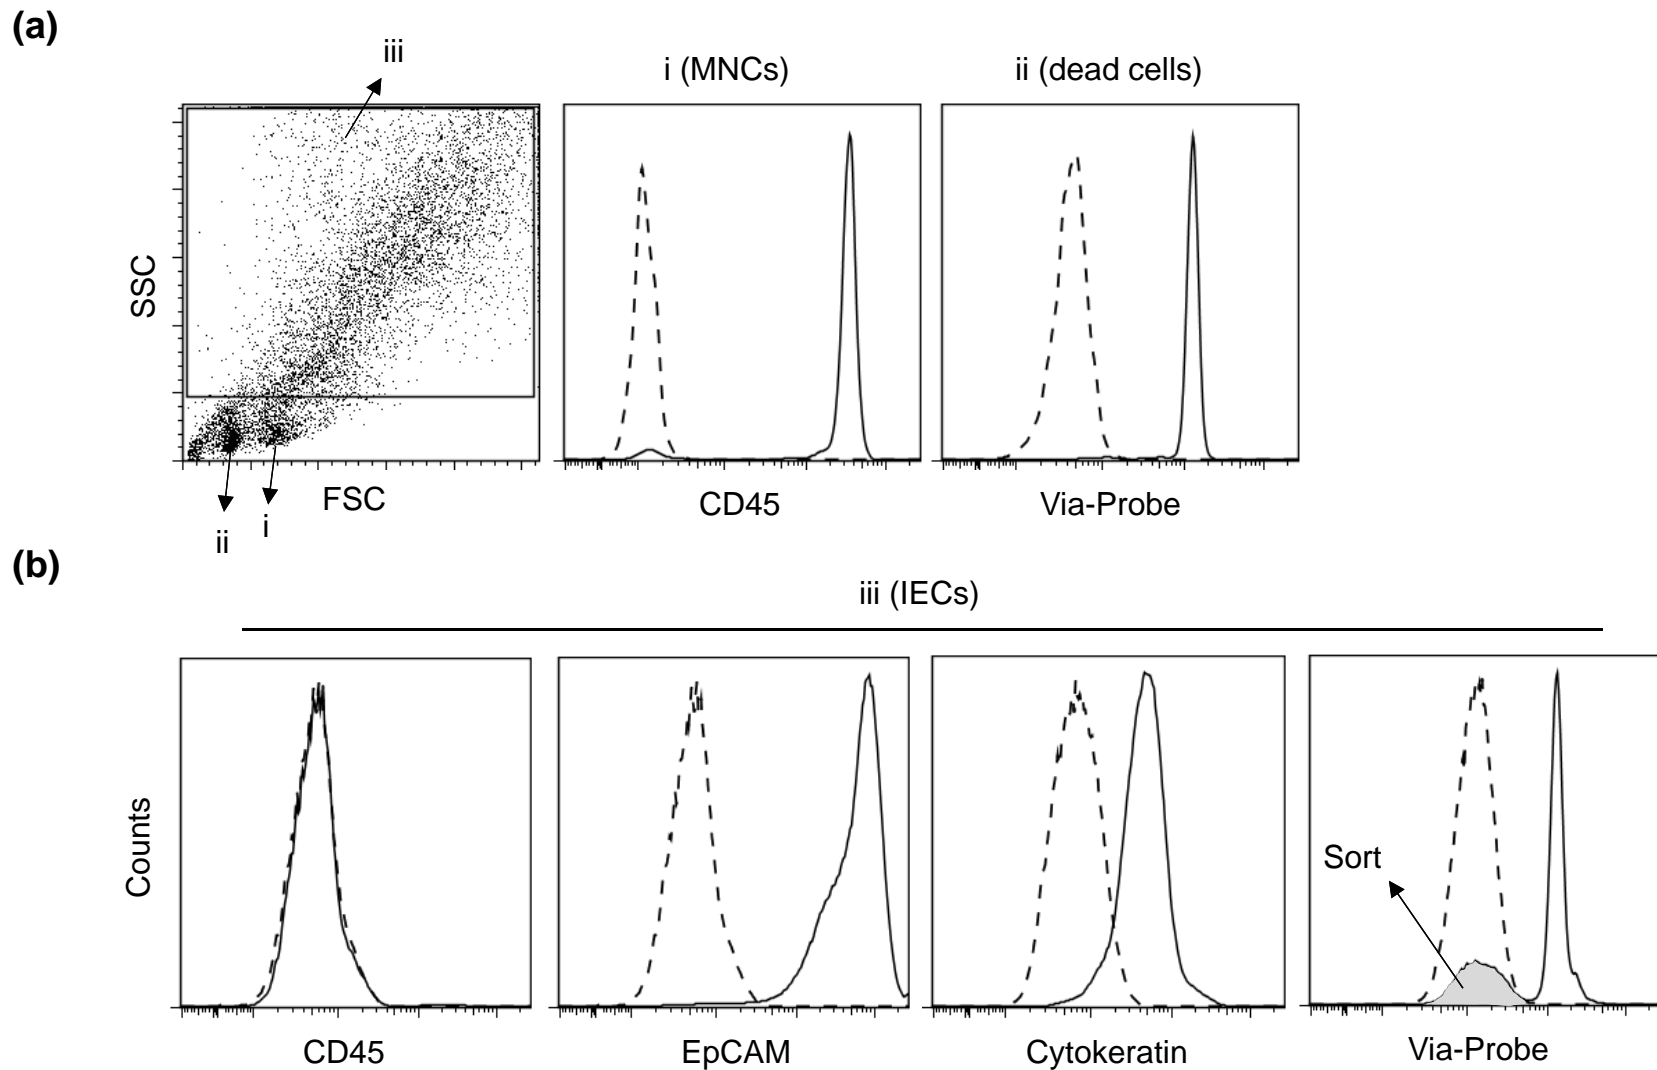

**Supplementary Figure 2.** Isolation of IECs. IECs were first isolated by a discontinuous density-gradient centrifugation from single-cell suspensions of small and large intestinal epithelium. The IECs isolated were then stained for cell viability (Via-Probe), gated by flow cytometry according to cell size, and sorted by fluorescence-activated cell sorting. **(b)** The cells gated were found to exclude CD45<sup>+</sup> mononuclear cells (e.g., lymphocytes) and Via-Probe<sup>+</sup> dead cells. **(b)** The IECs gated were CD45<sup>-</sup> and positive for epithelial cell adhesion molecule EpCAM<sup>+</sup> as well as for intracellular cytokeratin<sup>+</sup>. Only live (Via-Probe<sup>-</sup>) IECs were used in subsequent experiments. Histograms indicate representative results with the normal large-IECs. The IECs from all 4 samples (normal and inflamed small and large intestines) were isolated by the same methods.

**(a)**

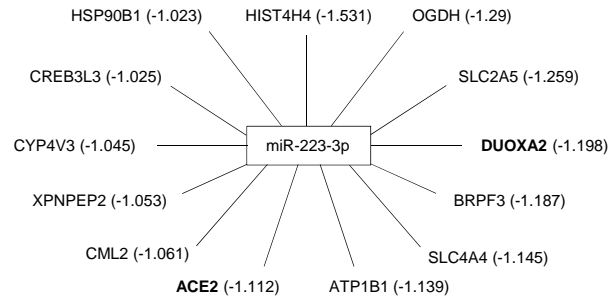

**(b)**

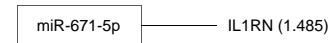

**Supplementary Figure 3.** The miRNA-regulated interactions in inflamed small-IECs. **(a)** Up-regulated miR-223-3p is associated with 13 target genes that were down-regulated in inflamed IECs. **(b)** In contrast, down-regulated miR-671-5p has a single target gene that was up-regulated in inflamed IECs. The numbers in parentheses indicate the fold-change (log base 2) of the genes in inflamed, compared with normal, IECs. The target genes are listed clockwise in order of their fold-change. Correlations were based on a TargetScan database analysis.

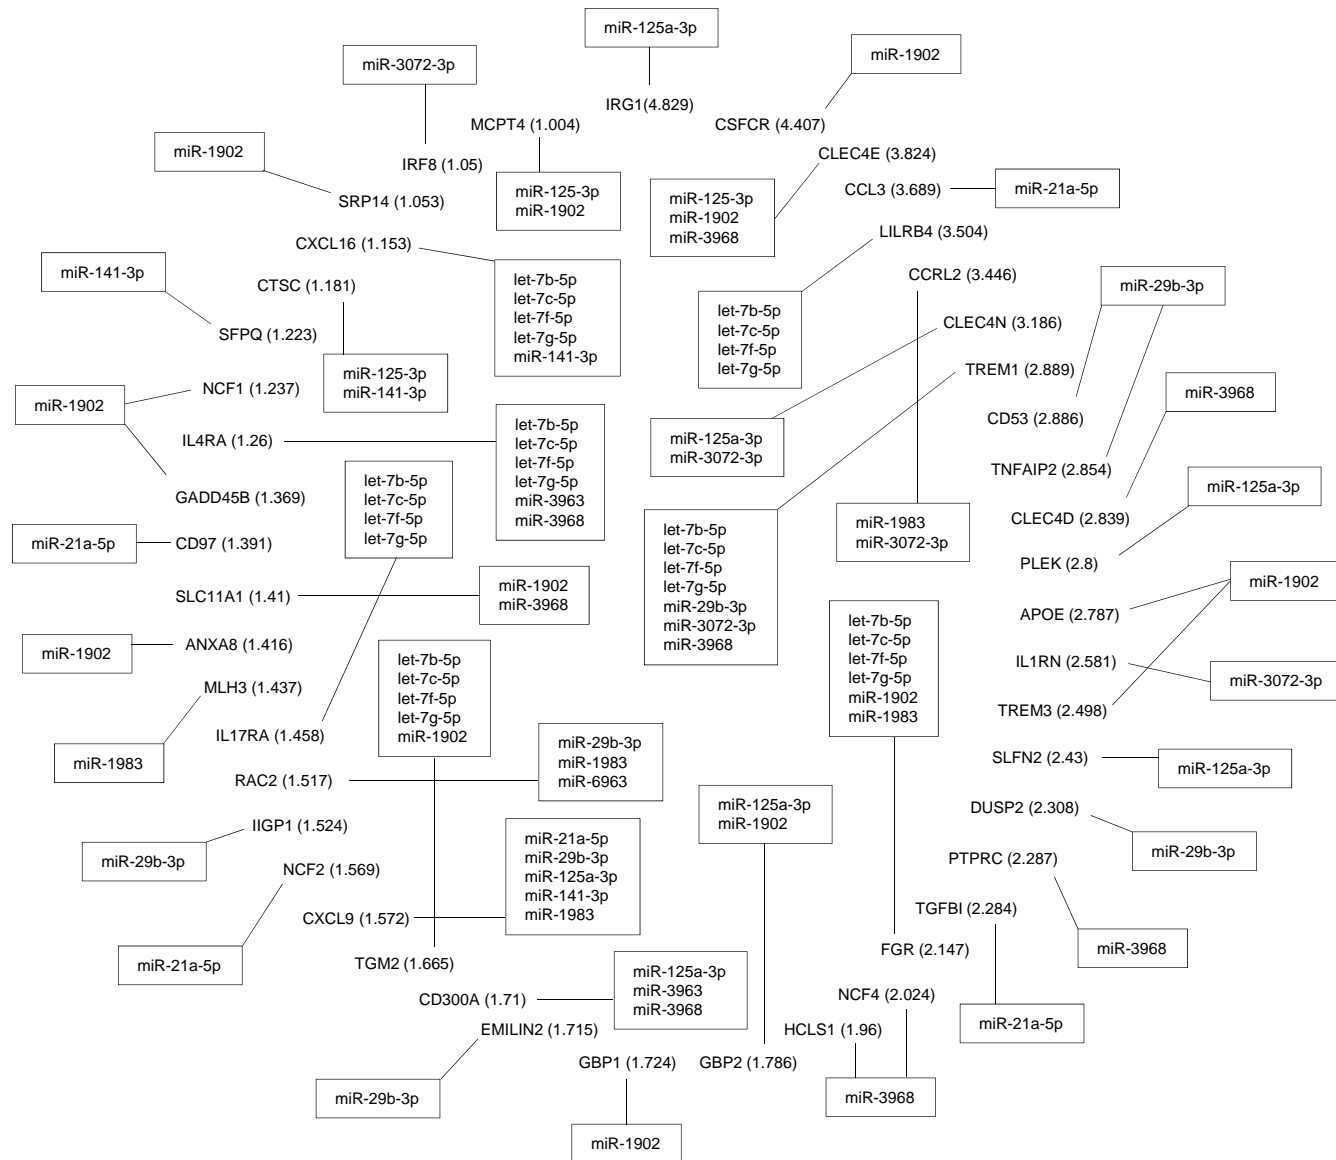

**Supplementary Figure 4.** The miRNA-regulated interactions in inflamed large-IECs. The predicted interactions between miRNAs and target genes in large-IECs were visualized according to mutually inversely correlated expressions. Potential miRNA–mRNA regulatory interactions were shown according to the criteria used in this study (>2-fold induction and fluorescence intensity >100 arbitrary units above background). 13 miRNAs down-regulated in inflamed IECs might suppress the expression of 45 mRNA targets under normal conditions.

|   |                                                           |
|---|-----------------------------------------------------------|
| 2 | Platelet activation, aggregation (0.047, REACT_301119)    |
| 2 | Calcium signaling pathway (0.038, mmu04020)               |
| 2 | Assembly of the primary cilium (0.03, REACT_319807)       |
| 2 | FoxO signaling pathway (0.02, mmu04068)                   |
| 2 | Vascular smooth muscle contraction (0.02, mmu04270)       |
| 2 | Basal body anchoring plasma membrane (0.01, REACT_328862) |
| 2 | Muscle contraction (0.0043, REACT_317508)                 |
| 2 | Netrin-1 signaling (0.0024, REACT_293956)                 |
| 2 | Sema3a-plexin repulsion signaling (0.00025, REACT_340782) |
| 3 | Endocytosis (0.007, mmu04144)                             |
| 3 | Platelet activation (0.0014, mmu04611)                    |
| 3 | Semaphorin interactions (0.00016, REACT_288138)           |
| 3 | Platelet homeostasis (0.00009, REACT_277342)              |
| 4 | Hemostasis (0.007, REACT_344959)                          |
| 5 | Axon guidance (0.00008, REACT_317797)                     |

**Supplementary Figure 5.** Predicted biological pathways that are generated by analysis of the target genes of significantly altered miRNAs in inflamed large-IECs. TargetMine, which is a bioinformatics tools, was used to provide the pathway. The numbers in black bars indicate the number of different target genes associated in each pathway. Information inside the parenthesis shows *p*-values ( $p < 0.05$ ) and corresponding source IDs.

**(a)**

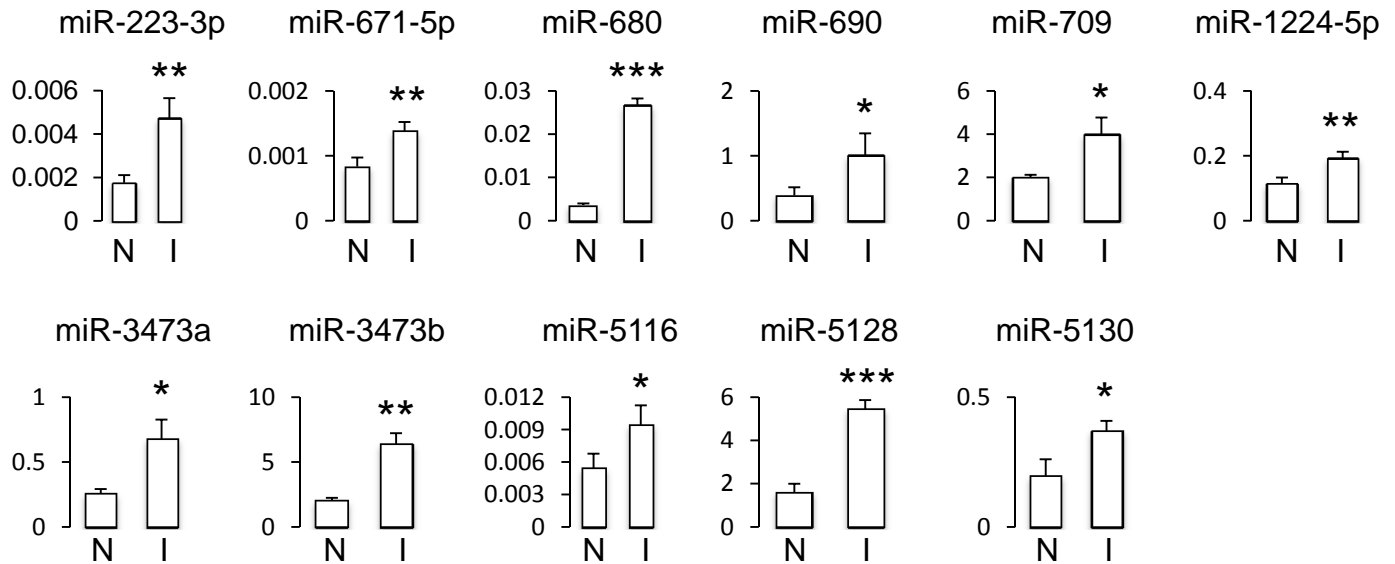

**(b)**

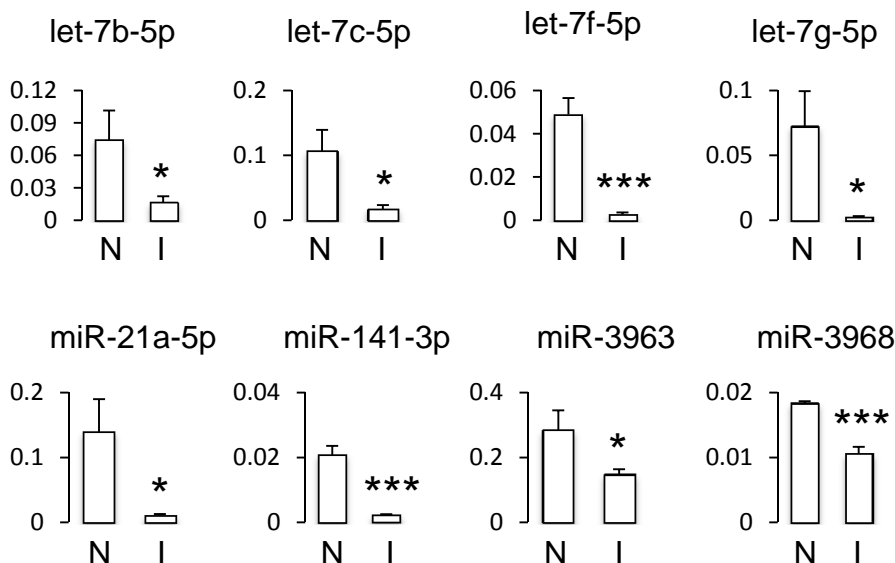

**(c)**

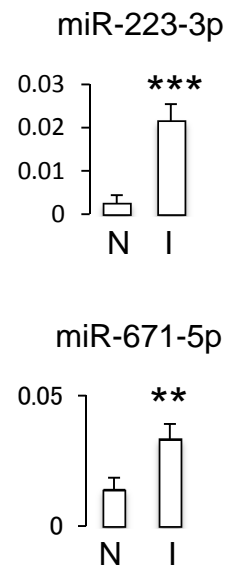

**Supplementary Figure 6.** Validation of miRNA expression by using quantitative real-time PCR. **(a)** These miRNAs showed up-regulated expression in inflamed (I), compared with normal (N), large-IECs, consistent with the microarray data. **(b)** These miRNAs showed down-regulated expression in the inflamed, compared with normal, large-IECs, consistent with the microarray data. **(c)** Expression of miR-223-3p was higher in inflamed, compared with normal, small-IECs; this finding is consistent with the microarray data. However, the expression of miR-671-5p was up-regulated in inflamed small-IECs, in contradiction of the microarray data (see Discussion). U6 was used as an endogenous control for normalizing miRNA levels. All experiments were repeated at least 3 times. The data are presented as mean  $\pm$  1 standard deviation. \*,  $0.01 < p < 0.05$ ; \*\*,  $0.001 < p < 0.01$ ; \*\*\*,  $p < 0.001$  vs. control (two-tailed Student's *t*-test).

**(a)**

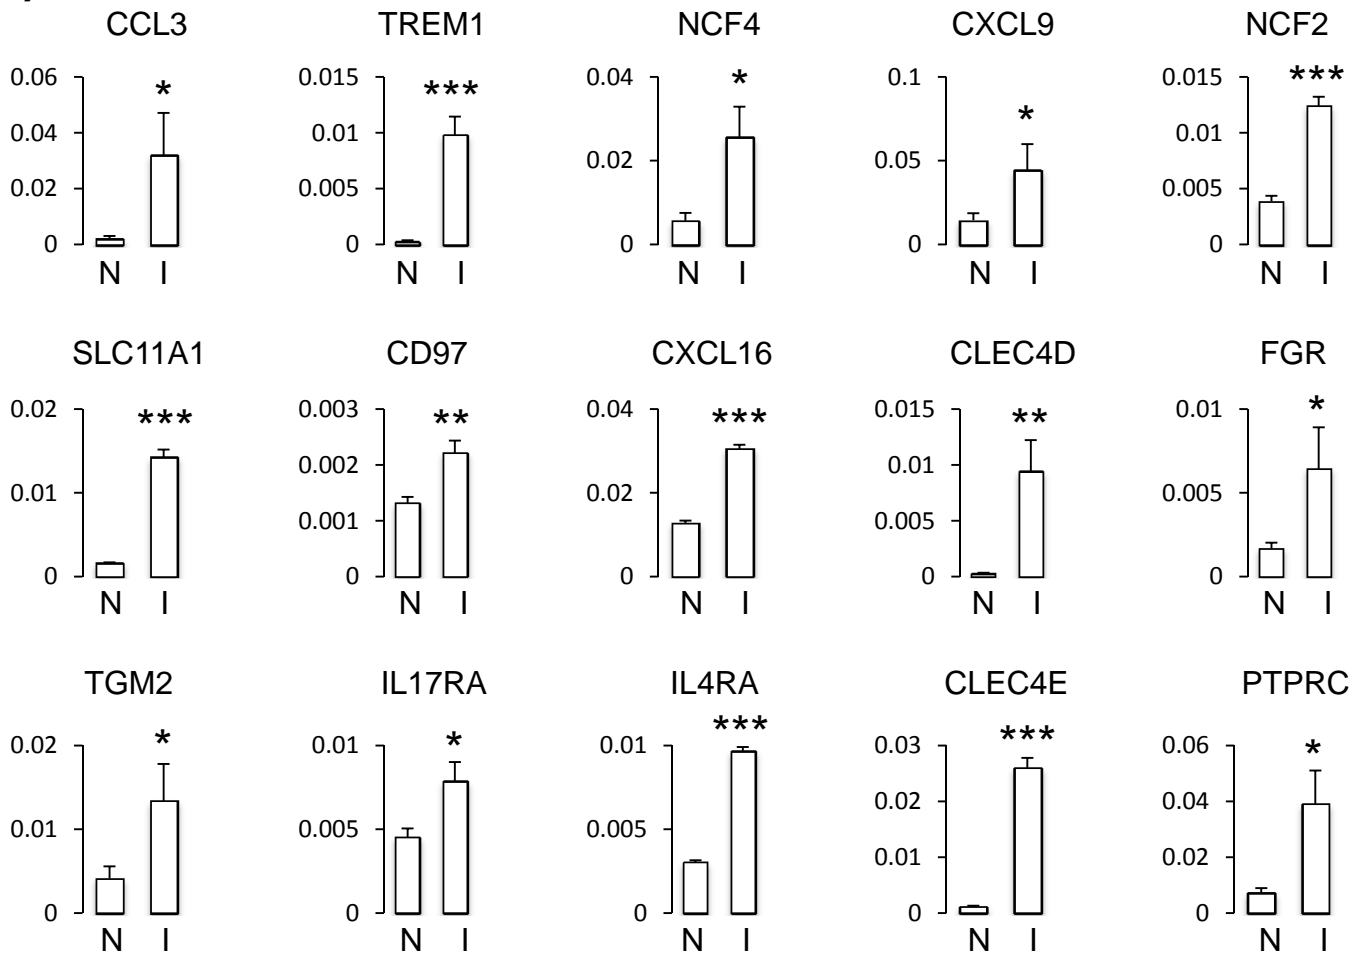

**(b)**

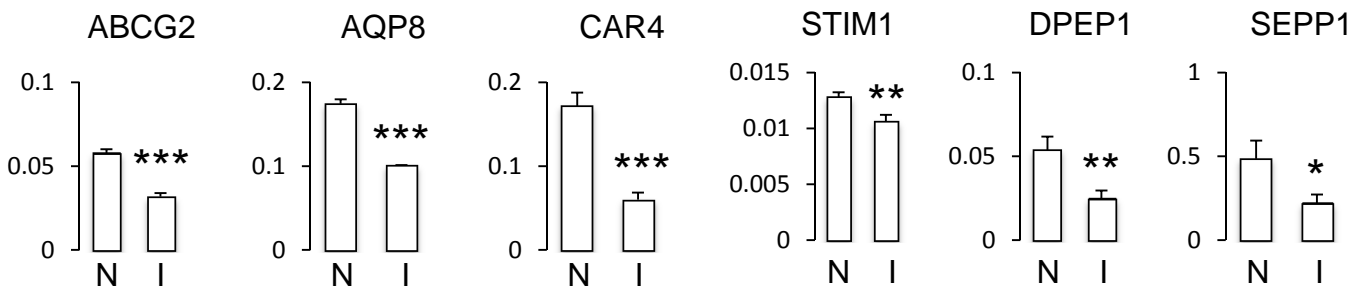

**Supplementary Figure 7.** Validation of mRNA expression by using quantitative real-time PCR. **(a)** These mRNAs showed up-regulated expression in inflamed (I), compared with normal (N), large-IECs, consistent with the microarray data. **(b)** These mRNAs showed down-regulated expression in the inflamed, compared with normal, large-IECs, consistent with the microarray data. b-actin was used as an endogenous control for normalizing mRNA levels. All experiments were repeated at least 3 times. The data are presented as mean  $\pm$  1 standard deviation. \*,  $0.01 < p < 0.05$ ; \*\*,  $0.001 < p < 0.01$ ; \*\*\*,  $p < 0.001$  vs. control (two-tailed Student's *t*-test).



**Supplementary Table 1.** Primer sequences used in quantitative real-time PCR

|             | Forward (5' → 3')        | Reverse (5' → 3')           |
|-------------|--------------------------|-----------------------------|
| let-7b-5p   | TGAGGTAGTAGGTTGTGTGGTT   | Universal primer            |
| let-7c-5p   | TGAGGTAGTAGGTTGTATGGTT   | Universal primer            |
| let-7f-5p   | TGAGGTAGTAGATTGTATAGTT   | Universal primer            |
| let-7g-5p   | TGAGGTAGTAGTTTGTACAGTT   | Universal primer            |
| miR-21a-5p  | TAGCTTATCAGACTGATGTTGA   | Universal primer            |
| miR-141-3p  | TAACACTGTCTGGTAAAGATGG   | Universal primer            |
| miR-223-3p  | TGTCAGTTTGTCAAATACCCCA   | Universal primer            |
| miR-671-5p  | AGGAAGCCCTGGAGGGGCTGGAG  | Universal primer            |
| miR-680     | GGGCATCTGCTGACATGGGGG    | Universal primer            |
| miR-690     | AAAGGCTAGGCTCACAACCAAA   | Universal primer            |
| miR-709     | GGAGGCAGAGGCAGGAGGA      | Universal primer            |
| miR-1224-5p | GTGAGGACTGGGGAGGTGGAG    | Universal primer            |
| miR-3473a   | TGGAGAGATGGCTCAGCA       | Universal primer            |
| miR-3473b   | GGGCTGGAGAGATGGCTCAG     | Universal primer            |
| miR-3963    | TGTATCCCACTTCTGACAC      | Universal primer            |
| miR-3968    | CGAATCCCACTCCAGACACCA    | Universal primer            |
| miR-5116    | TTTGATAGGAACCCCGCCTGA    | Universal primer            |
| miR-5128    | CAATTGGGGCTGGCGAGATGGCT  | Universal primer            |
| miR-5130    | CTGGAGCGCGGGCGAGGCAGGC   | Universal primer            |
| U6          | GCGCGTCTGAAGCGTTC        | GTGCAGGGTCCGAGGT            |
| ABCG2       | CGCAGAAGGAGATGTGTT       | TTGGATCTTTCCTTGCTGCT        |
| AQP8        | TGTGTAGTATGGACCTACCTGAG  | ACCGATAGACATCCGATGAAGAT     |
| CAR4        | CTCCTTCTTGCTCTGCTG       | GACTGCTGATTCTCCTTA          |
| CCL3        | TGAAACCAGCAGCCTTTGCTC    | AGGCATTTCAGTTCCAGGTCAGTG    |
| CD97        | CCTGGTCGGCGTGGAGAATGAAG  | GGGCGATGGCGGTGATGGTC        |
| CLEC4D      | AGTAACGTGCATCCGAGAGG     | GGAAGGCTCTCCAGCTAACA        |
| CLEC4E      | AGTGCTCTCCTGGACGATAG     | CCTGATGCCTCACTGTAGCAG       |
| CXCL9       | TCCTTTGGGCATCATCTTC      | TTCCCCCTCTTTTGCTTTTT        |
| CXCL16      | CCTTGCTCTGGCGTTCTTCC     | TCCAAAGTACCCTGCGGTATC       |
| DPEP1       | ATGCGGTATCTGACCCTCAC     | ATCTGCAAAGCGTCCTTCAT        |
| FGR         | TAAGATCCGAAAGCTGGACACG   | CGACACCACCGCATACAGC         |
| IL4RA       | CACCTGGAGTGAGTGGAGTC     | AGGCAAAACAACGGGATG          |
| IL17RA      | AGTGTTTCCCTCTACCCAGCAC   | GAAAACCGCCACCGCTTAC         |
| NCF2        | TCGGATTACCCTCAGTCGCAG    | GCATGTAAGGCATAGGCACGCTG     |
| NCF4        | CAAGGGTGTGTCTCCACAAG     | TTGCTGTTCCAGTGAAGTC         |
| PTPRC       | TCATGGTACACGATGTGAAGA    | AGCCCGAGTGCCTTCCT           |
| SEPP1       | TGTTGAAGAAGCCATTAAGATCG  | CACAGTTTTACAGAAGTCTTCATCTTC |
| SLC11A1     | GGACAGTTTCGTGATGGAGGG    | TTGAGTAGATCGTTGAGGCCG       |
| STIM1       | GCTCTCAATGCCATGCCTTCCAAT | TCTAGGCCATGGTTCAACGCCATA    |
| TGM2        | GCCTTGGAACCTTGGGCAGTTTGA | TCATCATTCAGTTGACCATGCCG     |
| TREM1       | GAGCTTGAAGGATGAGGAAGGC   | CAGAGTCTGTCACTTGAAGGTCAGTC  |
| β-actin     | CCTAAGGCCAACCCTGAAAAG    | GTGCAGGGTCCGAGGT            |
